# Supplementary material
Source: PubMed Central journal article supplement (PMC6413316)
Supplement: NIHMS1016188-supplement-Tables.pdf [file NIHMS1016188-supplement-Tables.pdf]

**Neuron, Volume 101**

**Supplemental Information**

**Ca<sub>v</sub>2.1  $\alpha_1$  Subunit Expression**

**Regulates Presynaptic Ca<sub>v</sub>2.1 Abundance**

**and Synaptic Strength at a Central Synapse**

**Matthias Lübbert, R. Oliver Goral, Christian Keine, Cannon Thomas, Debbie Guerrero-Given, Travis Putzke, Rachel Satterfield, Naomi Kamasawa, and Samuel M. Young Jr.**

**Table S1: Related to P7 Presynaptic Calcium Current Measurements**

|                                                                       | Mean | SEM | n  | P           | statistics                               |
|-----------------------------------------------------------------------|------|-----|----|-------------|------------------------------------------|
| <b>I<sub>Ca</sub> in 2 mM Ca<sup>2+</sup> (pA)</b>                    |      |     |    |             |                                          |
| control                                                               | 868  | 51  | 5  | control     | Mood's Median test, Bonferroni corrected |
| Cav2.1 $\alpha_1$ OE                                                  | 1916 | 211 | 4  | 0.0328 (*)  |                                          |
| Cav2.2 $\alpha_1$ OE                                                  | 758  | 132 | 6  | >0.9999     |                                          |
| <b>I<sub>Ca</sub> sensitive to <math>\omega</math>-agatoxin (pA)</b>  |      |     |    |             |                                          |
| Control                                                               | 567  | 66  | 5  | control     | Mood's Median test, Bonferroni corrected |
| Cav2.1 $\alpha_1$ OE                                                  | 1712 | 272 | 4  | 0.0328 (*)  |                                          |
| Cav2.2 $\alpha_1$ OE                                                  | 373  | 92  | 6  | 0.2434      |                                          |
| <b>I<sub>Ca</sub> sensitive to <math>\omega</math>-conotoxin (pA)</b> |      |     |    |             |                                          |
| Control                                                               | 172  | 26  | 5  | control     | Mood's Median test, Bonferroni corrected |
| Cav2.1 $\alpha_1$ OE                                                  | 59   | 26  | 4  | 0.0054 (**) |                                          |
| Cav2.2 $\alpha_1$ OE                                                  | 328  | 119 | 6  | >0.9999     |                                          |
| <b>I<sub>Ca</sub> sensitive to Cd<sup>2+</sup> (pA)</b>               |      |     |    |             |                                          |
| Control                                                               | 128  | 31  | 5  | control     | Kruskal-Wallis test, Dunn's test         |
| Cav2.1 $\alpha_1$ OE                                                  | 97   | 45  | 4  | 0.9679      |                                          |
| Cav2.2 $\alpha_1$ OE                                                  | -11  | 53  | 6  | 0.6740      |                                          |
| <b>I<sub>Ca</sub> in 1 mM Ca<sup>2+</sup> (pA)</b>                    |      |     |    |             |                                          |
| Control                                                               | 821  | 74  | 10 | control     | One-tailed t-test                        |
| Cav2.1 $\alpha_1$ OE                                                  | 1067 | 72  | 10 | 0.0140 (*)  |                                          |
| Control                                                               | 908  | 74  | 10 | control     | Two-tailed t-test                        |
| Cav2.2 $\alpha_1$ OE                                                  | 809  | 49  | 10 | 0.2808      |                                          |
| <b>tail I<sub>Ca</sub> in 1 mM Ca<sup>2+</sup> (pA)</b>               |      |     |    |             |                                          |
| Control                                                               | 1683 | 104 | 10 | control     | One-tailed t-test                        |
| Cav2.1 $\alpha_1$ OE                                                  | 2246 | 128 | 10 | 0.0015 (**) |                                          |
| Control                                                               | 1784 | 133 | 10 | control     | Two-tailed t-test                        |
| Cav2.2 $\alpha_1$ OE                                                  | 2081 | 128 | 10 | 0.1242      |                                          |
| <b>Membrane capacitance C<sub>slow</sub> (pF)</b>                     |      |     |    |             |                                          |
| Control                                                               | 21.6 | 2.5 | 10 | control     | Two-tailed MW                            |
| Cav2.1 $\alpha_1$ OE                                                  | 20.4 | 2.6 | 10 | 0.8381      |                                          |
| Control                                                               | 21.1 | 1.8 | 10 | control     | Two-tailed t-test                        |
| Cav2.2 $\alpha_1$ OE                                                  | 22.2 | 1.9 | 10 | 0.6565      |                                          |

|                                                             |       |     |    |            |                                                 |
|-------------------------------------------------------------|-------|-----|----|------------|-------------------------------------------------|
| <b>Ca<sup>2+</sup> currents as function of voltage</b>      |       |     |    |            |                                                 |
| <b>Half-maximal activation voltage V<sub>m</sub> (mV)</b>   |       |     |    |            |                                                 |
| Control                                                     | -20.8 | 0.6 | 10 | control    | Two-tailed t-test                               |
| Cav2.1 α <sub>1</sub> OE                                    | -19.2 | 1   | 10 | 0.1813     |                                                 |
| Control                                                     | -16.6 | 0.7 | 10 | control    | Two-tailed t-test                               |
| Cav2.2 α <sub>1</sub> OE                                    | -16.6 | 0.9 | 10 | 0.9788     |                                                 |
| <b>Voltage-dependence of activation k<sub>m</sub> (mV)</b>  |       |     |    |            |                                                 |
| Control                                                     | 8.6   | 0.6 | 10 | control    | Two-tailed t-test<br>with Welch's<br>correction |
| Cav2.1 α <sub>1</sub> OE                                    | 6.9   | 0.2 | 10 | 0.0148 (*) |                                                 |
| Control                                                     | 8.6   | 0.3 | 10 | control    | Two-tailed t-test                               |
| Cav2.2 α <sub>1</sub> OE                                    | 8.5   | 0.4 | 10 | 0.7164     |                                                 |
| <b>Ca<sup>2+</sup> tail currents as function of voltage</b> |       |     |    |            |                                                 |
| <b>Half-maximal activation voltage V<sub>0.5</sub> (mV)</b> |       |     |    |            |                                                 |
| Control                                                     | -20   | 0.9 | 10 | control    | Two-tailed t-test                               |
| Cav2.1 α <sub>1</sub> OE                                    | -21.7 | 1.0 | 10 | 0.2365     |                                                 |
| Control                                                     | -18.5 | 0.7 | 10 | control    | Two-tailed t-test                               |
| Cav2.2 α <sub>1</sub> OE                                    | -18.6 | 0.8 | 10 | 0.9259     |                                                 |
| <b>Voltage-dependence of activation k (mV)</b>              |       |     |    |            |                                                 |
| Control                                                     | 8.2   | 0.9 | 10 | control    | Two-tailed MW                                   |
| Cav2.1 α <sub>1</sub> OE                                    | 11.3  | 1.0 | 10 | 0.0272 (*) |                                                 |
| Control                                                     | 12    | 1.0 | 10 | control    | Two-tailed MW                                   |
| Cav2.2 α <sub>1</sub> OE                                    | 11.5  | 2.3 | 10 | 0.2710     |                                                 |

MW – Mann-Whitney *U* test

**Table S2: Related to P7 EM and mEPSC measurements**

| <b>Total P-face area analyzed (<math>\mu\text{m}^2</math>)</b>                        |                 |                      |                |                     |                   |
|---------------------------------------------------------------------------------------|-----------------|----------------------|----------------|---------------------|-------------------|
| Control                                                                               | 118.5           |                      |                |                     |                   |
| Cav2.1 $\alpha_1$ OE                                                                  | 164.85          |                      |                |                     |                   |
| <b>Total # of replicas analyzed</b>                                                   |                 |                      |                |                     |                   |
| Control                                                                               | 8               |                      |                |                     |                   |
| Cav2.1 $\alpha_1$ OE                                                                  | 7               |                      |                |                     |                   |
| <b>Total # of gold particles</b>                                                      |                 |                      |                |                     |                   |
| Control                                                                               | 2290            |                      |                |                     |                   |
| Cav2.1 $\alpha_1$ OE                                                                  | 7314            |                      |                |                     |                   |
| <b>Total # of clusters (&gt;1 particle)</b>                                           |                 | <b>30 nm</b>         | <b>100 nm</b>  |                     |                   |
| Control                                                                               | 428             | 208                  |                |                     |                   |
| Cav2.1 $\alpha_1$ OE                                                                  | 957             | 343                  |                |                     |                   |
| <b>Ratio of particles that are [%]</b>                                                |                 | <b>clustered</b>     | <b>single</b>  | <b>P</b>            | <b>Statistics</b> |
| Control                                                                               | 89.1            | 10.9                 | control        | Fisher's exact test |                   |
| Cav2.1 $\alpha_1$ OE                                                                  | 95.2            | 4.8                  | <0.0001 (****) |                     |                   |
| <b>Gold particle # per cluster</b>                                                    |                 | <b>Mean [median]</b> | <b>SEM</b>     | <b>n</b>            |                   |
| Control                                                                               | 4.8 [4]         | 0.2                  | 428            | control             | One-tailed MW     |
| Cav2.1 $\alpha_1$ OE                                                                  | 7.3 [4]         | 0.3                  | 957            | <0.0001 (****)      |                   |
| <b>Cluster area (<math>\mu\text{m}^2</math>)</b>                                      |                 |                      |                |                     |                   |
| Control                                                                               | 0.0091 [0.0072] | 0.0003               | 428            | control             | One-tailed MW     |
| Cav2.1 $\alpha_1$ OE                                                                  | 0.0122 [0.0079] | 0.0004               | 957            | 0.0006 (***)        |                   |
| <b>Gold particle density (#/<math>\mu\text{m}^2</math> cluster area)</b>              |                 |                      |                |                     |                   |
| Control                                                                               | 506.3 [490.2]   | 4.6                  | 428            | control             | One-tailed MW     |
| Cav2.1 $\alpha_1$ OE                                                                  | 563.3 [541.1]   | 4.2                  | 957            | <0.0001 (****)      |                   |
| <b>Gold particle density (#/<math>\mu\text{m}^2</math> putative active zone area)</b> |                 |                      |                |                     |                   |
| Control                                                                               | 86.6 [81.9]     | 2.2                  | 208            | control             | One-tailed MW     |
| Cav2.1 $\alpha_1$ OE                                                                  | 110.8 [107.8]   | 2.6                  | 343            | <0.0001 (****)      |                   |

|                                                               |                  |       |     |                   |                      |
|---------------------------------------------------------------|------------------|-------|-----|-------------------|----------------------|
| <b>Putative active zone area (<math>\mu\text{m}^2</math>)</b> |                  |       |     |                   |                      |
| Control                                                       | 0.105<br>[0.067] | 0.008 | 208 | control           | One-tailed<br>MW     |
| Cav2.1 $\alpha_1$ OE                                          | 0.153<br>[0.083] | 0.011 | 343 | 0.0015<br>(**)    |                      |
| <b>Cluster number per putative active zone</b>                |                  |       |     |                   |                      |
| Control                                                       | 1.59 [1]         | 0.14  | 271 | control           | One-tailed<br>MW     |
| Cav2.1 $\alpha_1$ OE                                          | 2.44 [1]         | 0.17  | 390 | <0.0001<br>(****) |                      |
| <b>Single gold particles per putative active zone</b>         |                  |       |     |                   |                      |
| Control                                                       | 0.92 [1]         | 0.08  | 271 | control           | One-tailed<br>MW     |
| Cav2.1 $\alpha_1$ OE                                          | 0.90 [1]         | 0.08  | 390 | 0.0508            |                      |
| <b>Cluster density (<math>\#/\mu\text{m}^2</math> P-face)</b> |                  |       |     |                   |                      |
| Control                                                       | 4.1 [3.8]        | 0.7   | 8   | control           | One-tailed<br>MW     |
| Cav2.1 $\alpha_1$ OE                                          | 6.1 [6.9]        | 0.5   | 7   | 0.0361 (*)        |                      |
| <b>Nearest Neighbor Distance (nm)</b>                         |                  |       |     |                   |                      |
| Control                                                       | 38.1 [33]        | 1.4   | 203 | control           | One-tailed<br>MW     |
| Cav2.1 $\alpha_1$ OE                                          | 35.5<br>[29.6]   | 1.1   | 390 | <0.0032<br>(**)   |                      |
| <b>Active zone length (nm)</b>                                |                  |       |     |                   |                      |
| Control                                                       | 358.2<br>[309.8] | 15.8  | 120 | control           | Two-tailed<br>MW     |
| Cav2.1 $\alpha_1$ OE                                          | 398.9<br>[336.5] | 19.8  | 118 | 0.1916            |                      |
| <b># of docked synaptic vesicles</b>                          |                  |       |     |                   |                      |
| Control                                                       | 2.18 [2]         | 0.14  | 120 | control           | Two-tailed<br>MW     |
| Cav2.1 $\alpha_1$ OE                                          | 2.03 [2]         | 0.13  | 118 | 0.8227            |                      |
| <b>mEPSC amplitude (pA)</b>                                   |                  |       |     |                   |                      |
| Control                                                       | 37.2             | 1.6   | 15  | control           | Two-tailed<br>t-test |
| Cav2.1 $\alpha_1$ OE                                          | 35.7             | 1.9   | 15  | 0.56              |                      |
| <b>mEPSC rate (Hz)</b>                                        |                  |       |     |                   |                      |
| Control                                                       | 0.56             | 0.1   | 15  | control           | Two-tailed<br>t-test |
| Cav2.1 $\alpha_1$ OE                                          | 0.92             | 0.1   | 15  | 0.036 (*)         |                      |

MW – Mann-Whitney *U* test

**Table S3: Related to P7 calyx AP-evoked synaptic transmission properties**

|                                       | <b>mean</b> | <b>SEM</b> | <b>n</b> | <b>P</b>     | <b>statistics</b> |
|---------------------------------------|-------------|------------|----------|--------------|-------------------|
| <b>Basal EPSC amplitude (nA)</b>      |             |            |          |              |                   |
| Control                               | 1.47        | 0.21       | 20       | control      | Two-tailed MW     |
| Ca <sub>v</sub> 2.1 $\alpha_1$ OE     | 3.10        | 0.37       | 20       | 0.0006 (***) |                   |
| <b>Rise time (<math>\mu</math>s)</b>  |             |            |          |              |                   |
| Control                               | 541         | 49         | 20       | control      | Two-tailed MW     |
| Ca <sub>v</sub> 2.1 $\alpha_1$ OE     | 581         | 37         | 20       | 0.2315       |                   |
| <b>Half width (<math>\mu</math>s)</b> |             |            |          |              |                   |
| Control                               | 1527        | 109        | 20       | control      | Two-tailed t-test |
| Ca <sub>v</sub> 2.1 $\alpha_1$ OE     | 1771        | 64         | 20       | 0.0617       |                   |
| <b>PPR (50 Hz)</b>                    |             |            |          |              |                   |
| Control                               | 1.29        | 0.16       | 17       | control      | Two-tailed t-test |
| Ca <sub>v</sub> 2.1 $\alpha_1$ OE     | 0.95        | 0.11       | 20       | 0.0897       |                   |
| <b>RRP SMN corr. (nA)</b>             |             |            |          |              |                   |
| Control                               | 12.4        | 1.6        | 17       | control      | Two-tailed MW     |
| Ca <sub>v</sub> 2.1 $\alpha_1$ OE     | 12.4        | 1.4        | 20       | 0.9878       |                   |
| <b>RRP NpRf (nA)</b>                  |             |            |          |              |                   |
| Control                               | 11.9        | 1.4        | 17       | control      | Two-tailed MW     |
| Ca <sub>v</sub> 2.1 $\alpha_1$ OE     | 12.1        | 1.4        | 20       | 0.8909       |                   |
| <b>P<sub>r</sub> SMN corr.</b>        |             |            |          |              |                   |
| Control                               | 0.2         | 0.03       | 17       | control      | Two-tailed MW     |
| Ca <sub>v</sub> 2.1 $\alpha_1$ OE     | 0.34        | 0.04       | 20       | 0.033 (*)    |                   |
| <b>P<sub>r</sub> NpRf</b>             |             |            |          |              |                   |
| Control                               | 0.19        | 0.03       | 17       | control      | Two-tailed MW     |
| Ca <sub>v</sub> 2.1 $\alpha_1$ OE     | 0.31        | 0.05       | 20       | 0.045 (*)    |                   |
| <b>Steady-state amplitude (pA)</b>    |             |            |          |              |                   |
| Control                               | 345         | 50         | 17       | control      | Two-tailed MW     |
| Ca <sub>v</sub> 2.1 $\alpha_1$ OE     | 237         | 31         | 20       | 0.0909       |                   |

MW – Mann-Whitney *U* test

**Table S4: Related to P20/21 Presynaptic Calcium Current Measurements**

|                                                             | Mean  | SEM | n  | P          | statistics        |
|-------------------------------------------------------------|-------|-----|----|------------|-------------------|
| <b>I<sub>Ca</sub> in 2 mM Ca<sup>2+</sup> (pA)</b>          |       |     |    |            |                   |
| Control                                                     | 1254  | 449 | 3  | control    | Two-tailed t-test |
| Cav2.2 α <sub>1</sub> OE                                    | 1124  | 156 | 3  | 0.798      |                   |
| <b>I<sub>Ca</sub> sensitive to ω-agatoxin (pA)</b>          |       |     |    |            |                   |
| Control                                                     | 1244  | 454 | 3  | control    | One-tailed t-test |
| Cav2.2 α <sub>1</sub> OE                                    | 969   | 181 | 3  | 0.3        |                   |
| <b>I<sub>Ca</sub> sensitive to ω-conotoxin (pA)</b>         |       |     |    |            |                   |
| Control                                                     | 3     | 3   | 3  | control    | One-tailed t-test |
| Cav2.2 α <sub>1</sub> OE                                    | 125   | 37  | 3  | 0.016 (*)  |                   |
| <b>I<sub>Ca</sub> in 1 mM Ca<sup>2+</sup> (pA)</b>          |       |     |    |            |                   |
| Control                                                     | 990   | 121 | 9  | control    | One-tailed t-test |
| Cav2.1 α <sub>1</sub> OE                                    | 1387  | 141 | 10 | 0.025 (*)  |                   |
| <b>tail I<sub>Ca</sub> in 1 mM Ca<sup>2+</sup> (pA)</b>     |       |     |    |            |                   |
| Control                                                     | 2122  | 207 | 9  | control    | One-tailed t-test |
| Cav2.1 α <sub>1</sub> OE                                    | 2469  | 185 | 10 | 0.113      |                   |
| <b>Membrane capacitance C<sub>slow</sub> (pF)</b>           |       |     |    |            |                   |
| Control                                                     | 16.9  | 1.8 | 9  | control    | Two-tailed t-test |
| Cav2.1 α <sub>1</sub> OE                                    | 20.3  | 1.9 | 10 | 0.216      |                   |
| <b>Ca<sup>2+</sup> currents as function of voltage</b>      |       |     |    |            |                   |
| <b>Half-maximal activation voltage V<sub>m</sub> (mV)</b>   |       |     |    |            |                   |
| Control                                                     | -22.9 | 1.9 | 9  | control    | Two-tailed t-test |
| Cav2.1 α <sub>1</sub> OE                                    | -24.3 | 0.6 | 10 | 0.4769     |                   |
| <b>Voltage-dependence of activation k<sub>m</sub> (mV)</b>  |       |     |    |            |                   |
| Control                                                     | 6.9   | 0.5 | 9  | control    | Two-tailed t-test |
| Cav2.1 α <sub>1</sub> OE                                    | 5.8   | 0.4 | 10 | 0.1138     |                   |
| <b>Ca<sup>2+</sup> tail currents as function of voltage</b> |       |     |    |            |                   |
| <b>Half-maximal activation voltage V<sub>0.5</sub> (mV)</b> |       |     |    |            |                   |
| Control                                                     | -13.2 | 1.3 | 9  | control    | Two-tailed t-test |
| Cav2.1 α <sub>1</sub> OE                                    | -16.2 | 1.0 | 10 | 0.0889     |                   |
| <b>Voltage-dependence of activation k (mV)</b>              |       |     |    |            |                   |
| Control                                                     | 5.9   | 0.4 | 9  | control    | Two-tailed t-test |
| Cav2.1 α <sub>1</sub> OE                                    | 4.6   | 0.4 | 10 | 0.0456 (*) |                   |

**Table S5: Related to P21 EM and mEPSC measurements**

| <b>Total area analyzed (<math>\mu\text{m}^2</math>)</b>                               |                    |                          |               |          |                            |
|---------------------------------------------------------------------------------------|--------------------|--------------------------|---------------|----------|----------------------------|
| Control                                                                               | 57.14              |                          |               |          |                            |
| Cav2.1 $\alpha_1$ OE                                                                  | 81.03              |                          |               |          |                            |
| <b>Total # of replicas analyzed</b>                                                   |                    |                          |               |          |                            |
| Control                                                                               | 13                 |                          |               |          |                            |
| Cav2.1 $\alpha_1$ OE                                                                  | 10                 |                          |               |          |                            |
| <b>Total # of gold particles</b>                                                      |                    |                          |               |          |                            |
| Control                                                                               | 1982               |                          |               |          |                            |
| Cav2.1 $\alpha_1$ OE                                                                  | 3307               |                          |               |          |                            |
| <b>Total # of clusters (&gt;1 particle)</b>                                           |                    | <b>30 nm</b>             | <b>100 nm</b> |          |                            |
| Control                                                                               | 334                |                          | 175           |          |                            |
| Cav2.1 $\alpha_1$ OE                                                                  | 456                |                          | 223           |          |                            |
| <b>Ratio of particles that are [%]</b>                                                |                    | <b>clustered</b>         | <b>single</b> | <b>P</b> | <b>Statistics</b>          |
| Control                                                                               | 90.4               |                          | 9.6           |          | control<br>0.0003<br>(***) |
| Cav2.1 $\alpha_1$ OE                                                                  | 93.3               |                          | 6.7           |          |                            |
| <b>Gold particle # per cluster</b>                                                    |                    | <b>Mean<br/>[median]</b> | <b>SEM</b>    | <b>n</b> |                            |
| Control                                                                               | 5.4 [3]            |                          | 0.3           |          | control<br>0.0139<br>(*)   |
| Cav2.1 $\alpha_1$ OE                                                                  | 6.8 [4]            |                          | 0.4           |          |                            |
| <b>Cluster area (<math>\mu\text{m}^2</math>)</b>                                      |                    |                          |               |          |                            |
| Control                                                                               | 0.0094<br>[0.0067] |                          | 0.0004        |          | control<br>0.0315<br>(*)   |
| Cav2.1 $\alpha_1$ OE                                                                  | 0.0118<br>[0.0073] |                          | 0.0006        |          |                            |
| <b>Gold particle density (#/<math>\mu\text{m}^2</math> cluster area)</b>              |                    |                          |               |          |                            |
| Control                                                                               | 533.8<br>[513.6]   |                          | 6.6           |          | control<br>0.1080          |
| Cav2.1 $\alpha_1$ OE                                                                  | 541.9<br>[526.3]   |                          | 5.6           |          |                            |
| <b>Gold particle density (#/<math>\mu\text{m}^2</math> putative active zone area)</b> |                    |                          |               |          |                            |
| Control                                                                               | 88.8<br>[76.5]     |                          | 3.2           |          | control<br>0.0001<br>(***) |
| Cav2.1 $\alpha_1$ OE                                                                  | 105.9<br>[97.72]   |                          | 3.3           |          |                            |



|                                                               |                  |       |     |                   |                      |
|---------------------------------------------------------------|------------------|-------|-----|-------------------|----------------------|
| <b>Putative active zone area (<math>\mu\text{m}^2</math>)</b> |                  |       |     |                   |                      |
| Control                                                       | 0.102<br>[0.058] | 0.011 | 175 | control           | One-tailed MW        |
| Cav2.1 $\alpha_1$ OE                                          | 0.116<br>[0.074] | 0.008 | 223 | 0.0075<br>(**)    |                      |
| <b>Cluster number per putative active zone</b>                |                  |       |     |                   |                      |
| Control                                                       | 1.46 [1]         | 0.16  | 230 | control           | One-tailed MW        |
| Cav2.1 $\alpha_1$ OE                                          | 1.60 [1]         | 0.14  | 285 | 0.0663            |                      |
| <b>Single gold particles per putative active zone</b>         |                  |       |     |                   |                      |
| Control                                                       | 0.82 [1]         | 0.09  | 230 | control           | One-tailed MW        |
| Cav2.1 $\alpha_1$ OE                                          | 0.78 [1]         | 0.06  | 285 | 0.4349            |                      |
| <b>Cluster density (<math>\#/\mu\text{m}^2</math> P-face)</b> |                  |       |     |                   |                      |
| Control                                                       | 5.5 [5.4]        | 0.7   | 13  | control           | One-tailed MW        |
| Cav2.1 $\alpha_1$ OE                                          | 5.3 [5.4]        | 0.7   | 10  | 0.4396            |                      |
| <b>Nearest Neighbor Distance (nm)</b>                         |                  |       |     |                   |                      |
| Control                                                       | 34.8<br>[29.4]   | 2     | 108 | control           | One-tailed MW        |
| Cav2.1 $\alpha_1$ OE                                          | 35.2<br>[28.7]   | 1.7   | 215 | 0.37              |                      |
| <b>Active zone length (nm)</b>                                |                  |       |     |                   |                      |
| Control                                                       | 376.7<br>[328.6] | 12.2  | 160 | control           | Two-tailed MW        |
| Cav2.1 $\alpha_1$ OE                                          | 329.9<br>[318.1] | 8.2   | 160 | 0.0339<br>(*)     |                      |
| <b># of docked synaptic vesicles</b>                          |                  |       |     |                   |                      |
| Control                                                       | 1.83 [2]         | 0.12  | 160 | control           | Two-tailed MW        |
| Cav2.1 $\alpha_1$ OE                                          | 1.04 [1]         | 0.09  | 160 | <0.0001<br>(****) |                      |
| <b>mEPSC amplitude (pA)</b>                                   |                  |       |     |                   |                      |
| Control                                                       | 44.8             | 3.4   | 15  | control           | Two-tailed<br>t-test |
| Cav2.1 $\alpha_1$ OE                                          | 45.1             | 3.4   | 15  | 0.95              |                      |
| <b>mEPSC rate (Hz)</b>                                        |                  |       |     |                   |                      |
| Control                                                       | 2.8              | 0.6   | 15  | control           | Two-tailed MW        |
| Cav2.1 $\alpha_1$ OE                                          | 4.4              | 1     | 15  | 0.35              |                      |

MW – Mann-Whitney *U* test

**Table S6: Related to P21 AP-evoked calyx synaptic transmission properties**

|                                       | mean | SEM  | n  | P              | statistics        |
|---------------------------------------|------|------|----|----------------|-------------------|
| <b>Basal EPSC amplitude (nA)</b>      |      |      |    |                |                   |
| Control                               | 0.57 | 0.1  | 10 | control        | Two-tailed MW     |
| Ca <sub>v</sub> 2.1 $\alpha_1$ OE     | 3.64 | 0.6  | 15 | <0.0001 (****) |                   |
| <b>Rise time (<math>\mu</math>s)</b>  |      |      |    |                |                   |
| Control                               | 242  | 13   | 10 | control        | Two-tailed MW     |
| Ca <sub>v</sub> 2.1 $\alpha_1$ OE     | 249  | 8    | 15 | >0.9999        |                   |
| <b>Half width (<math>\mu</math>s)</b> |      |      |    |                |                   |
| Control                               | 550  | 26   | 10 | control        | Two-tailed t-test |
| Ca <sub>v</sub> 2.1 $\alpha_1$ OE     | 590  | 16   | 15 | 0.1908         |                   |
| <b>PPR (300 Hz)</b>                   |      |      |    |                |                   |
| Control                               | 1.43 | 0.08 | 10 | control        | Two-tailed t-test |
| Ca <sub>v</sub> 2.1 $\alpha_1$ OE     | 1.16 | 0.09 | 14 | 0.04 (*)       |                   |
| <b>RRP SMN corr. (nA)</b>             |      |      |    |                |                   |
| Control                               | 12.0 | 1.9  | 10 | control        | Two-tailed MW     |
| Ca <sub>v</sub> 2.1 $\alpha_1$ OE     | 24.0 | 3.0  | 14 | 0.0109 (*)     |                   |
| <b>RRP NpRf (nA)</b>                  |      |      |    |                |                   |
| Control                               | 13.4 | 2.3  | 10 | control        | Two-tailed MW     |
| Ca <sub>v</sub> 2.1 $\alpha_1$ OE     | 24.3 | 3.1  | 14 | 0.0177 (*)     |                   |
| <b>P<sub>r</sub> SMN corr.</b>        |      |      |    |                |                   |
| Control                               | 0.08 | 0.02 | 10 | control        | Two-tailed MW     |
| Ca <sub>v</sub> 2.1 $\alpha_1$ OE     | 0.19 | 0.03 | 14 | 0.0024 (**)    |                   |
| <b>P<sub>r</sub> NpRf</b>             |      |      |    |                |                   |
| Control                               | 0.07 | 0.01 | 10 | control        | Two-tailed t-test |
| Ca <sub>v</sub> 2.1 $\alpha_1$ OE     | 0.18 | 0.03 | 14 | 0.0067 (**)    |                   |
| <b>Steady-state amplitude (pA)</b>    |      |      |    |                |                   |
| Control                               | 100  | 20   | 10 | control        | Two-tailed MW     |
| Ca <sub>v</sub> 2.1 $\alpha_1$ OE     | 129  | 19   | 14 | 0.6665         |                   |

MW – Mann-Whitney *U* test
